# Supplementary material
Source: MDPI journal article supplement (https://www.mdpi.com/2312-7481/9/1/9)
Supplement: s1 [file s1]

### **Supporting Information**

Levofloxacin adsorption onto MWCNTs/CoFe<sub>2</sub>O<sub>4</sub> nanocomposites: Mechanism, and modelling using non-linear kinetics and isotherm equations

Tariq J. Al-Musawi<sup>1</sup>, Ethar M. Al-Essa<sup>2</sup>, Nezamaddin Mengelizadeh<sup>3</sup>, Fatemeh Ganji<sup>4</sup>, Davoud Balarak<sup>5,\*</sup>

<sup>1</sup>Building and Construction Techniques Engineering Department, Al-Mustaqbal University College, 51001 Hillah, Babylon, Iraq.

<sup>2</sup>Department of Civil Engineering, Isra University, Amman, Jordan.

<sup>3</sup>Department of Environmental Health Engineering, Evas Faculty of Health, Larestan University of Medical Sciences, Larestan, Iran.

<sup>4</sup>Student Research Committee, Zahedan University of Medical Sciences, Zahedan, Iran.

<sup>5</sup>Department of Environmental Health, Health Promotion Research Center, Zahedan University of Medical Sciences, Zahedan, Iran.

**\*Corresponding author:**

Prof. Dr. Davoud Balarak

**Email:** dbalarak2@gmail.com.

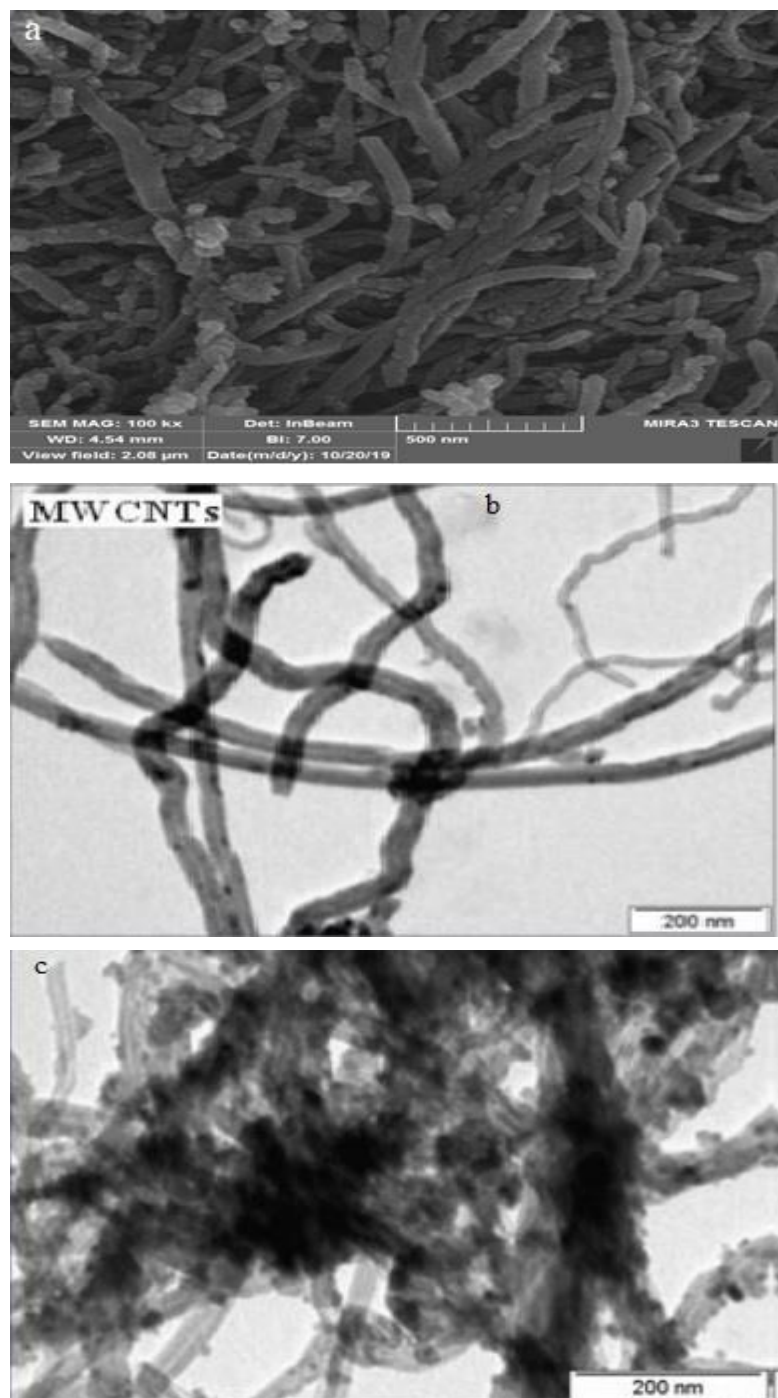

Figure S1. SEM image of MWCNTs/CoFe<sub>2</sub>O<sub>4</sub> (a), TEM image of MWCNTs (b), and TEM image of MWCNTs/CoFe<sub>2</sub>O<sub>4</sub> (c)

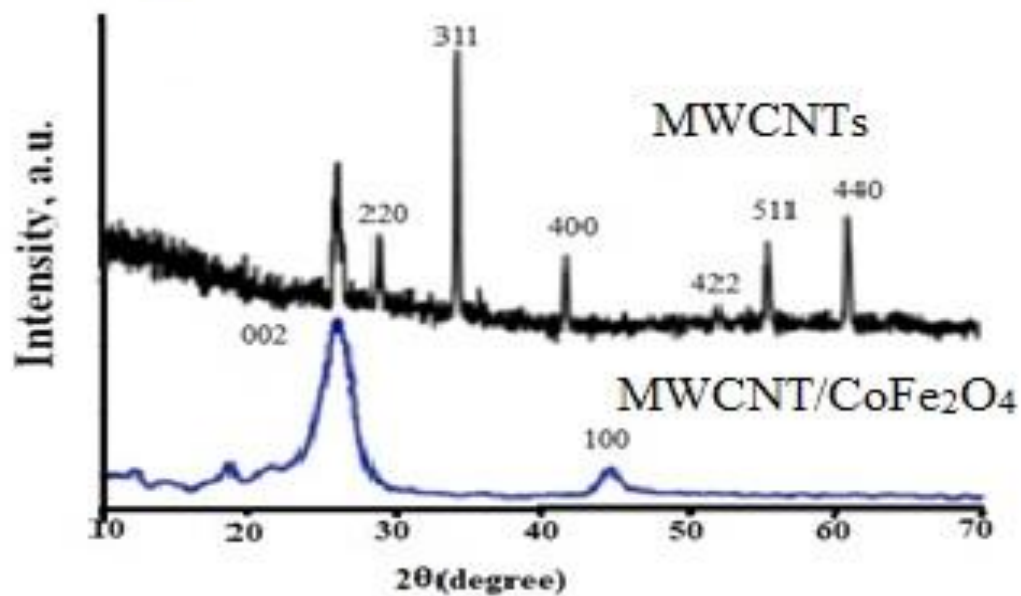

Figure S2. XRD patterns of the MWCNTs and MWCNTs/CoFe<sub>2</sub>O<sub>4</sub>

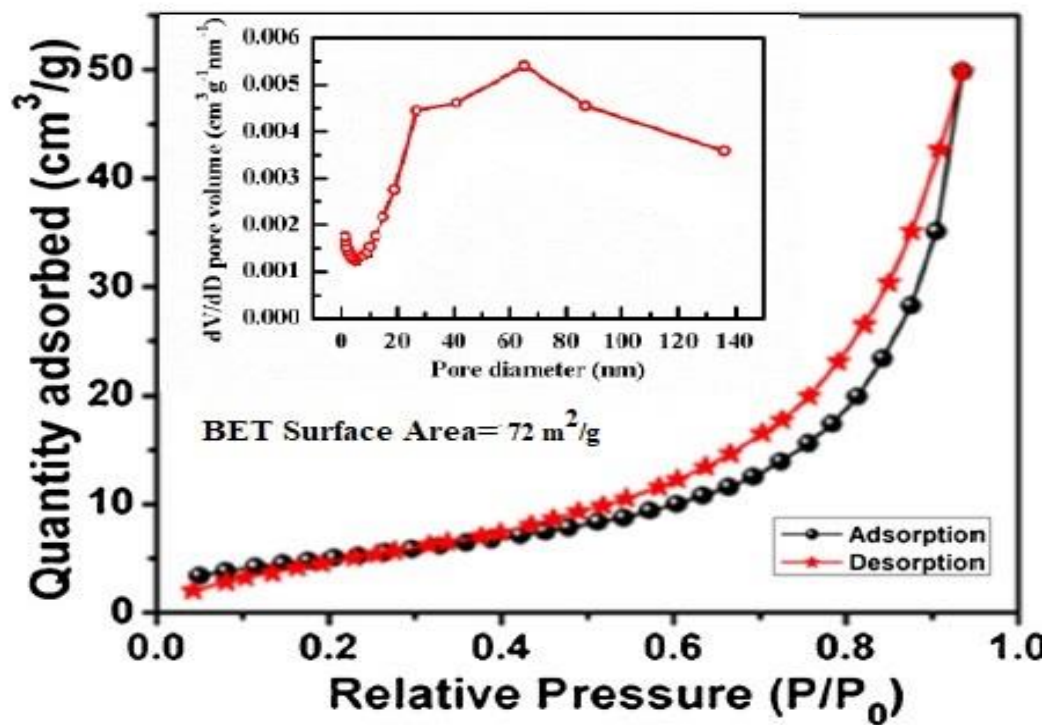

Figure S3. N<sub>2</sub> adsorption-desorption isotherms and pore size distribution

Table S1: Errors functions used to determine the goodness of fit of the experimental data with relevant theoretical model

| Error function                   | Abbreviation | Formula                                                                                                              | References |
|----------------------------------|--------------|----------------------------------------------------------------------------------------------------------------------|------------|
| Residual Root Mean Square Error  | RMSE         | $\sqrt{\left(\frac{1}{n-1} \sum_{i=1}^n (q_{e,exp} - q_{e,cal})\right)^2}$                                           | [1]        |
| Average Relative Error           | ARE          | $\frac{100}{n} \sum_{i=1}^n \left  \frac{q_{e,exp} - q_{e,cal}}{q_{e,exp}} \right _i$                                | [2]        |
| Sun of absolute errors           | EABS         | $\sum_{i=1}^n  q_{e,exp,i} - q_{e,cal,i} $                                                                           | [3]        |
| Hybrid fractional error function | HYBRID       | $\frac{100}{n-p} \sum_{i=1}^n \left[ \frac{(q_{e,exp} - q_{e,cal})^2}{q_{e,exp}} \right]$                            | [4]        |
| Nonlinear chi-square test        | $\chi^2$     | $\sum_{i=1}^n \frac{(q_{e,cal} - q_{e,exp})^2}{q_{e,exp}}$                                                           | [5]        |
| Coefficient of determination     | $R^2$        | $\frac{(q_{e,exp} - \overline{q_{e,cal}})^2}{\sum (q_{e,exp} - \overline{q_{e,cal}})^2 + (q_{e,exp} - q_{e,cal})^2}$ | [4]        |

Table S2: Non-linear forms of kinetic models

| Kinetic                                     | Equation                                                                                                                                                                                                                                                   | References |
|---------------------------------------------|------------------------------------------------------------------------------------------------------------------------------------------------------------------------------------------------------------------------------------------------------------|------------|
| Pseudo-first-order kinetic model (PFO)      | $q_t = q_e(1 - e^{-k_1 t})$<br>$K_1$ : Equilibrium rate constant for pseudo-first order kinetics (1/min)                                                                                                                                                   | [6]        |
| Pseudo-second-order kinetic model (PSO)     | $q_t = \frac{k_2 q_e^2 t}{1 + k_2 q_e t}$<br>$K_2$ : Equilibrium rate constant for pseudo-second order kinetics (PSO) (g/mg. min)                                                                                                                          | [7]        |
| Elovich                                     | $q_t = \frac{\ln(\alpha\beta)}{\beta} + \frac{\ln(t)}{\beta}$<br>$\alpha$ : Indicates the chemical adsorption rate (mg/mg min), $\beta$ : Coefficient in relation to the extension of covered surface and activation energy of chemical adsorption (g/mg). | [8]        |
| Intraparticle diffusion kinetic model (IPD) | $q_t = K_{id} t^{1/2} + C$<br>$K_b$ : Intra-particle Diffusion (IPD) rate constant (mg/g. min <sup>1/2</sup> ),<br>C: Thickness of the boundary layer (mg/g)                                                                                               | [5]        |

Table S3: Non-linear forms of isotherms models

| Isotherm                    | Equation                                                                                                                                                                                                                                                                                                                                                                                                                                                                                                                                             | References |
|-----------------------------|------------------------------------------------------------------------------------------------------------------------------------------------------------------------------------------------------------------------------------------------------------------------------------------------------------------------------------------------------------------------------------------------------------------------------------------------------------------------------------------------------------------------------------------------------|------------|
| Langmuir                    | $Q_e = \frac{Q_m K_L C_e}{1 + K_L C_e}$ <p><math>K_L</math>: Langmuir adsorption constant (l/mg), <math>q_m</math>: Maximum adsorption capacity (mg/g), <math>R_L</math>: Dimensionless separation factor, the values of <math>R_L</math> show whether the adsorption process is irreversible (<math>R_L = 0</math>), linear (<math>R_L = 1</math>), favorable (<math>0 &lt; R_L &lt; 1</math>) or undesirable (<math>R_L &gt; 1</math>).</p>                                                                                                        | [9]        |
| Freundlich                  | $Q_e = K_F C_e^{1/n}$ <p><math>K_F</math>: Freundlich constant (mg/g)(L/mg)<sup>1/n</sup>, <math>n</math>: Heterogeneity factor. If the value of <math>n &lt; 1</math>, the adsorption is a chemical process; if <math>n &gt; 1</math>, then it is a physical process.</p>                                                                                                                                                                                                                                                                           | [4]        |
| Dubinin-Radushkevitch (D-R) | $Q_e = Q_m \exp(-K' \varepsilon^2), \varepsilon = RT \ln(1 + \frac{1}{C_e})$ $E = (2K_D)^{-1/2}$ <p><math>B</math>: Activity coefficient constant (mol<sup>2</sup>/kJ<sup>2</sup>), <math>\varepsilon</math>: Polanyi potential (kJ/mol), which is equal to <math>RT \ln(1 + \frac{1}{C_e})</math>, where <math>R</math> is the ideal gas constant (8.314 J/(mol.K)), and <math>T</math> is the thermodynamic absolute temperature (K), <math>E</math>: The adsorption energy (kJ/mol), which is equal to <math>\frac{1}{\sqrt{-2\beta}}</math>.</p> | [10]       |
| Temkin                      | $(q_e = B_T \ln(K_T C_e))$ <p><math>K_T</math>: Constant of equilibrium binding (L/mg), <math>B_T</math>: Temkin constant associated with the heat of adsorption (J/mol).</p>                                                                                                                                                                                                                                                                                                                                                                        | [11]       |
| Redlich-Peterson            | $q_e = \frac{A_{RP} C_e}{1 + B_{RP} C_e^{\beta_{RP}}}$ <p><math>A_{RP}</math>: Redlich–Peterson isotherm constant (L/g)</p> <p><math>B_{RP}</math>: Redlich–Peterson isotherm constant <math>(\frac{L}{mg})^{\beta_{RP}}</math>, <math>\beta_{RP}</math>: An exponent which lies between 0 and 1</p>                                                                                                                                                                                                                                                 | [8]        |
| Sips                        | $q_e = \frac{K_s C_e^{\beta_s}}{1 + a_s C_e^{\beta_s}}$ <p><math>K_s</math>: Sips model isotherm constant <math>(\frac{mg}{g})(\frac{L}{mg})^{\beta_s}</math></p> <p><math>a_s</math>: Sips model isotherm constant <math>(\frac{L}{mg})^{\beta_s}</math>, <math>\beta_s</math>: An exponent which lies between 0 and 1</p>                                                                                                                                                                                                                          | [12]       |
| Toth                        | $(q_e = \frac{q_m K_T C_e}{(1 + (K_T C_e)^n)^{\frac{1}{n}}})$ <p><math>q_m</math>: Maximum adsorption capacity (mg/g)</p> <p><math>K_T</math>: Toth isotherm constant (L/mg)</p> <p><math>n</math>: Toth isotherm constant (<math>0 &lt; n \leq 1</math>)</p>                                                                                                                                                                                                                                                                                        | [13]       |

|      |                                                                                                                                                                                                                                                                                                                                                                                                     |      |
|------|-----------------------------------------------------------------------------------------------------------------------------------------------------------------------------------------------------------------------------------------------------------------------------------------------------------------------------------------------------------------------------------------------------|------|
| Hill | $(q_e = \frac{Q_{SH}C_e^{nH}}{K_D + C_e^{nH}})$ <p><math>Q_{SH}</math>: saturation for maximum uptake (mg/L)</p> <p><math>K_D</math>: Hill constant, <math>nH</math>: coefficient of binding interaction.<br/> <math>nH &gt; 1</math>, positive cooperatively in binding, <math>nH = 1</math>, non-cooperative or hyperbolic binding, <math>nH &lt; 1</math>, negative cooperatively in binding</p> | [3]  |
| Kahn | $(Q_e = \frac{q_m b_K C_e}{(1 + b_K C_e)^{a_K}})$ <p><math>q_m</math>: Maximum adsorption capacity (mg/g)</p> <p><math>b_K</math>: Khan model constants, <math>a_K</math>: is the Khan model exponent</p>                                                                                                                                                                                           | [14] |

---

## References

- [1] Rahman N, Varshney P. Assessment of ampicillin removal efficiency from aqueous solution by polydopamine/zirconium(IV) iodate: optimization by response surface methodology. *RSC Advances*. 2020; 10, 20322-20337.
- [2] Chitongo R, Opeolu BO and Olatunji OS. Abatement of Amoxicillin, Ampicillin, and Chloramphenicol from Aqueous Solutions Using Activated Carbon Prepared from Grape Slurry. *Clean Soil Air Water*, 2019; 47, 1800077.
- [3] Ahmadi S, Banach A, Mostafapour FK. survey of cupric oxide nanoparticles in removal efficiency of ciprofloxacin antibiotic from aqueous solution: Adsorption isotherm study. *Desalin Water Treat*. 2017; 89; 297-303.
- [4] Balarak D, Taheri Z, Shim MJ, Lee SM, Jeon C. Adsorption kinetics and thermodynamics and equilibrium of ibuprofen from aqueous solutions by activated carbon prepared from *lemna minor*. *Desalin Water Treat*. 2021; 215; 183-193.
- [5] Fakhri A, Rashidi S, Asif M, Tyagi I, Agarwal S, Gupta VK. Dynamic adsorption behavior and mechanism of Cefotaxime, Cefradine and Cefazolin antibiotics on CdS-MWCNT nanocomposites. *J Mol Liq*. 2016; 215; 269-275.
- [6] Bazrafshan E, Sobhanikia M, Mostafapour FK. Chromium biosorption from aqueous environments by mucilaginous seeds of *Cydonia oblonga*: Kinetic and thermodynamic studies. *Global Nest J*. 2017; 19(2), 269-277.
- [7] Yu F, Li Y, Han S, Jie M. Adsorptive removal of antibiotics from aqueous solution using carbon Materials. *Chemosphere*. 2016; 153; 365–385.
- [8] Balarak D, Mahvi AH, Shim MJ, Lee SM. Adsorption of ciprofloxacin from aqueous solution onto synthesized NiO: Isotherm, kinetic and thermodynamic studies. *Desalin Water Treat*. 2021; 212, 390-400.

- [9] Ge. Y. L., Y.F. Zhang, Y. Yang, S. Xie, Y. Liu, T. Maruyama, Z.-Y. Deng, X. Zhao, Enhanced adsorption and catalytic degradation of organic dyes by nanometer iron oxide anchored to single-wall carbon nanotubes. *Appl. Surf. Sci.* 2019; 488, 813–826.
- [10] Amirmahani N., Mahdizadeh H., Malakootian, M. et al. Evaluating Nanoparticles Decorated on  $\text{Fe}_3\text{O}_4@\text{SiO}_2$ -Schiff Base ( $\text{Fe}_3\text{O}_4@\text{SiO}_2$ -APTMS-HBA) in Adsorption of Ciprofloxacin from Aqueous Environments. *J Inorg Organomet Polym* 2020; 30, 3540–3551.
- [11] Nassar MY, Ahmed IS, Raya MA, A facile and tunable approach for synthesis of pure silica nanostructures from rice husk for the removal of ciprofloxacin drug from polluted aqueous solutions. *J. Mol. Liq.* 2019; 282, 251–263.
- [12] Fei Y, Li Y, Han S, Ma J, Adsorptive removal of ciprofloxacin by sodium alginate/graphene oxide composite beads from aqueous solution. *J. Colloid Interface Sci.* 2016; 484, 196–204.
- [13] Shikuku VO, Zanella, Kowenje CO. Single and binary adsorption of sulfonamide antibiotics onto iron-modified clay: linear and nonlinear isotherms, kinetics, thermodynamics, and mechanistic studies. *Appl Water Sci.* 2018; 8, 175. <https://doi.org/10.1007/s13201-018-0825-4>.
- [14] Berges J, Moles, Ormad MP. Antibiotics removal from aquatic environments: adsorption of enrofloxacin, trimethoprim, sulfadiazine, and amoxicillin on vegetal powdered activated carbon. *Environ Sci Pollut Res.* 2021; 28, 8442–8452.
